# Supplementary material for: Coupling and metabolic analysis of urbanization and environment between two resource-based cities in North China
Source: PeerJ. 2019 May 2;7:e6869. doi: 10.7717/peerj.6869 (PMC6500719; doi:10.7717/peerj.6869)
Supplement: Supplemental Information 1 [file peerj-07-6869-s001.xlsx]

## Sheet: Sheet1
Solar		Dongying		Binzhou	Dongying-Binzhou
Solar energy=Energy (J) ¼ (area incl shelf)*(avginsolation)*(1-albedo)
	Solar		Solar
2000	5264	3.33658e+19	5264	3.98085e+19	7.31742e+19
2001	5015	3.17875e+19	5015	3.79254e+19	6.97129e+19
2002	5289	3.35242e+19	5289	3.99975e+19	7.35218e+19
2003	5025	3.18509e+19	5025	3.80011e+19	6.98519e+19
2004	5175	3.28016e+19	5175	3.91354e+19	7.19371e+19
2005	5274	3.34291e+19	5274	3.98841e+19	7.33132e+19
2006	4843	3.06973e+19	4843	3.66247e+19	6.7322e+19
2007	5023	3.18382e+19	5023	3.79859e+19	6.98241e+19
2008	4812	3.05008e+19	4812	3.63903e+19	6.6891e+19
2009	5031	3.18889e+19	5031	3.80464e+19	6.99353e+19
2010	4887	3.09762e+19	4887	3.69574e+19	6.79336e+19
2011	4984	3.1591e+19	4984	3.7691e+19	6.9282e+19
2012	4943	3.13311e+19	4943	3.73809e+19	6.8712e+19
2013	5036	3.19206e+19	5036	3.80842e+19	7.00048e+19
2014	4926	3.12234e+19	4926	3.72524e+19	6.84757e+19
2015	4702	2.98035e+19	4702	3.55584e+19	6.53619e+19
2016	5025	3.18509e+19	5025	3.80011e+19	6.98519e+19

## Sheet: Sheet2
Rain, chemical potential energy	Dongying	Binzhou	Dongying	Dongying	Rain, geopotential energy
					energy=(area)*(rainfall)*(% runoff)*(avg elevation)*(1000 g/m3) (gravity)
Energy=(area)*(Evapotrans)*(Gibbs no.)
Dongying:avg elevation:8.8,m area:7923	357.7	599.7	1.40002e+16	2.24037e+16	1.75549e+15	4.88818e+14	1.26667e+15	2000
Binzhou:avg elevation: 11.4m area:9453	575	415.9	2.25053e+16	1.55373e+16	1664226411288000	785771448000000	8.78455e+14	2001
	555.9	308.7	2.17577e+16	1.15325e+16	1411699617720000	759670170336000	652029447384000	2002
	782.3	779.5	3.06189e+16	2.91208e+16	2715502137432000	1.06906e+15	1646443000440000	2003
	555.9	780.8	2.17577e+16	2.91693e+16	2408859002592000	759670170336000	1.64919e+15	2004
	660.1	661.8	2.58361e+16	2.47237e+16	2299905234480000	9.02066e+14	1397839612176000	2005
	449.3	500.8	1.75854e+16	1.8709e+16	1.67177e+15	6.13995e+14	1.05778e+15	2006
	595	587.2	2.32881e+16	2.19368e+16	2.05337e+15	813102628800000	1.24027e+15	2007
	410.1	490.3	1.60512e+16	1.83168e+16	1.59603e+15	5.60426e+14	1.0356e+15	2008
	634.1	632	2.48184e+16	2.36104e+16	2201431785504000	866535087264000	1334896698240000	2009
	548.1	640.2	2.14524e+16	2.39168e+16	2.10123e+15	749011009824000	1.35222e+15	2010
	592.6	537.6	2.31941e+16	2.00838e+16	1.94533e+15	809822887104000	1.13551e+15	2011
	634.7	635.4	2.48419e+16	2.37374e+16	2.20943e+15	8.67355e+14	1342078104528000	2012
	720.8	710.9	2.82118e+16	2.6558e+16	2486563323720000	9.85016e+14	1501547567688000	2013
	357.8	442.8	1.40042e+16	1.65422e+16	1.42423e+15	4.88955e+14	9.35273e+14	2014
	555.9	678.2	2.17577e+16	2.53364e+16	2.19215e+15	759670170336000	1.43248e+15	2015
	609.8	592	2.38673e+16	2.21161e+16	2083737268032000	8.33328e+14	1250409565440000	2016

## Sheet: Sheet3
Wind	Dingying	Binzhou
Energy (J) =(area)*(avg air density)*(drag coefficient)*(velocity³)
	2.9	2.7	1.05e+17	1.01104e+17
	2.9	2.7	1.05e+17	1.01104e+17
	2.9	2.7	1.05e+17	1.01104e+17
	2.9	2.7	1.05e+17	1.01104e+17
	2.9	2.7	1.05e+17	1.01104e+17
	2.9	2.7	1.05e+17	1.01104e+17
	2.9	2.7	1.05e+17	1.01104e+17
	2.9	2.7	1.05e+17	1.01104e+17
	2.9	2.7	1.05e+17	1.01104e+17
	2.9	2.7	1.05e+17	1.01104e+17
	2.9	2.7	1.05e+17	1.01104e+17
	2.9	2.7	1.05e+17	1.01104e+17
	2.9	2.7	1.05e+17	1.01104e+17
	2.9	2.7	1.05e+17	1.01104e+17
	2.9	2.7	1.05e+17	1.01104e+17
	2.9	2.7	1.05e+17	1.01104e+17
	2.9	2.7	1.05e+17	1.01104e+17
	2.9	2.7	1.05e+17	1.01104e+17

## Sheet: Sheet4
海浪能	Dongying shore length	Binzhou shore length	Dongying shore length	Binzhou shore length	Tidal energy
energy=(shore length)*(1.68E+8 Kcal)*(4186 J/Kcal)					energy= (shelf)*(0.5)*(tides/yr)*(mean tidal range)²*(densityof seawater)*(gravity)
Dingying shore length：351000 Binzhou shore length：283900
2000	351000	283900	2.4684e+17	1.99652e+17		4800000000	2000000000	2.5466e+16	1.06108e+16
2001	351000	283900	2.4684e+17	1.99652e+17		4800000000	2000000000	2.5466e+16	1.06108e+16
2002	351000	283900	2.4684e+17	1.99652e+17		4800000000	2000000000	2.5466e+16	1.06108e+16
2003	351000	283900	2.4684e+17	1.99652e+17		4800000000	2000000000	2.5466e+16	1.06108e+16
2004	351000	283900	2.4684e+17	1.99652e+17		4800000000	2000000000	2.5466e+16	1.06108e+16
2005	351000	283900	2.4684e+17	1.99652e+17		4800000000	2000000000	2.5466e+16	1.06108e+16
2006	351000	283900	2.4684e+17	1.99652e+17		4800000000	2000000000	2.5466e+16	1.06108e+16
2007	351000	283900	2.4684e+17	1.99652e+17		4800000000	2000000000	2.5466e+16	1.06108e+16
2008	351000	283900	2.4684e+17	1.99652e+17		4800000000	2000000000	2.5466e+16	1.06108e+16
2009	351000	283900	2.4684e+17	1.99652e+17		4800000000	2000000000	2.5466e+16	1.06108e+16
2010	351000	283900	2.4684e+17	1.99652e+17		4800000000	2000000000	2.5466e+16	1.06108e+16
2011	351000	283900	2.4684e+17	1.99652e+17		4800000000	2000000000	2.5466e+16	1.06108e+16
2012	351000	283900	2.4684e+17	1.99652e+17		4800000000	2000000000	2.5466e+16	1.06108e+16
2013	351000	283900	2.4684e+17	1.99652e+17		4800000000	2000000000	2.5466e+16	1.06108e+16
2014	351000	283900	2.4684e+17	1.99652e+17		4800000000	2000000000	2.5466e+16	1.06108e+16
2015	351000	283900	2.4684e+17	1.99652e+17		4800000000	2000000000	2.5466e+16	1.06108e+16
2016	351000	283900	2.4684e+17	1.99652e+17		4800000000	2000000000	2.5466e+16	1.06108e+16

## Sheet: Sheet5
Average river geopotential work:	Dongying	Binzhou		Chemical potential energy of river water relative to sea water salinity	Dongying	Binzhou
energy=(ruanoff)*(1.00E+03 kg/m3)*(elevation)*(9.8 m/sec²)				energy=(runoff)*(1.00E+03 kg/m3)*(4.94 J Gibbs free energy/g)
2000	1.20221e+17	1.2005e+17		2000	1.75494e+17	1.49929e+17
2001	9.7129e+16	9.7129e+16		2001	1.75494e+17	1.49929e+17
2002	1.05258e+17	3.50967e+15		2002	1.75494e+17	1.49929e+17
2003	9.9127e+16	3.50967e+15		2003	1.75494e+17	1.49929e+17
2004	1.09417e+17	3.50967e+15		2004	1.75494e+17	1.49929e+17
2005	1.28796e+17	3.50967e+15		2005	1.75494e+17	1.49929e+17
2006	1.49977e+17	3.50967e+15		2006	1.75494e+17	1.49929e+17
2007	1.62325e+17	3.50967e+15		2007	1.75494e+17	1.49929e+17
2008	1.40716e+17	3.50967e+15		2008	1.75494e+17	1.49929e+17
2009	1.45432e+17	3.50967e+15		2009	1.75494e+17	1.49929e+17
2010	1.63954e+17	3.50967e+15		2010	1.75494e+17	1.49929e+17
2011	1.38829e+17	3.50967e+15		2011	1.75494e+17	1.49929e+17
2012	2.45417e+17	3.50967e+15		2012	1.75494e+17	1.49929e+17
2013	2.03142e+17	3.50967e+15		2013	1.75494e+17	1.49929e+17
2014	9.80122e+16	3.50967e+15		2014	1.75494e+17	1.49929e+17
2015	1.14562e+17	3.50967e+15		2015	1.75494e+17	1.49929e+17
2016	1.75187e+17	2.36253e+15		2016	1.75494e+17	1.49929e+17
Earth cycle:	Dongying	Binzhou
Energy= (Land area)*(Heat flow)
Heat flow=1.45E+06J/㎡
2000	1.14884e+16	1.37068e+16
2001	1.14884e+16	1.37068e+16
2002	1.14884e+16	1.37068e+16
2003	1.14884e+16	1.37068e+16
2004	1.14884e+16	1.37068e+16
2005	1.14884e+16	1.37068e+16
2006	1.14884e+16	1.37068e+16
2007	1.14884e+16	1.37068e+16
2008	1.14884e+16	1.37068e+16
2009	1.14884e+16	1.37068e+16
2010	1.14884e+16	1.37068e+16
2011	1.14884e+16	1.37068e+16
2012	1.14884e+16	1.37068e+16
2013	1.14884e+16	1.37068e+16
2014	1.14884e+16	1.37068e+16
2015	1.14884e+16	1.37068e+16
2016	1.14884e+16	1.37068e+16

## Sheet: Sheet6
畜产品	Dongying meat/t	milk	egg	Binzhou meat/t	milk	egg
Energy = (Total production)*(energy content)
16200000000	1E+10J/t	2.09E+10J/t	2.09E+10J/t	1E+1J/t	2.09E+10J/t	2.09E+10J/t
2000	96000	15000	69400	183000	15000	248000	2720000000000000	7330000000000000
2001	104200	10700	76700	194300	25600	222900	2868660000000000	7136650000000000
2002	116800	20100	85500	229100	43200	214500	3375040000000000	7676930000000000
2003	149100	47900	89600	238200	79000	197600	4364750000000000	8162940000000000
2004	161400	64800	99200	277800	121200	200600	5041600000000000	9503620000000000
2005	184800	82700	108600	328400	92900	204600	5846170000000000	9501750000000000
2006	187408	90600	108870	320600	108200	157000	6043003000000000	8748680000000000
2007	182408	118165	114798	359900	116100	169100	6693006700000000	9559680000000000
2008	208600	145600	118548	347300	106000	164200	7606693200000000	9120180000000000
2009	221100	154800	121000	378300	114000	188100	7975220000000000	1.00969e+16
2010	247800	165300	123900	416300	126100	217000	8522280000000000	1.13338e+16
2011	257100	164200	127500	454100	132700	239200	8667530000000000	1.23137e+16
2012	268400	187800	128400	471300	133000	246100	9292580000000000	1.26362e+16
2013	275500	187100	131000	474000	113000	239000	9403290000000000	1.20968e+16
2014	233100	233000	127400	458400	94200	229800	9863360000000000	1.13556e+16
2015	184900	312200	111100	410000	86000	227000	1.0696e+16	1.06417e+16
2016	167700	348600	91600	384000	60000	215000	1.08772e+16	9587500000000000
Aquatic products
4.7E+9J/t
Energy = (Total production)*(energy content)	Dongying Total production	Binzhou Total production
2000	273100	215000		1283570000000000	1010500000000000	2294070000000000
2001	290891	239800		1367187700000000	1127060000000000	2494247700000000
2002	310041	257500		1457192700000000	1210250000000000	2667442700000000
2003	333200	279400		1566040000000000	1313180000000000	2879220000000000
2004	370656	313700		1742083200000000	1474390000000000	3216473200000000
2005	420000	339000		1974000000000000	1593300000000000	3567300000000000
2006	450010	375400		2115047000000000	1764380000000000	3879427000000000
2007	481625	390700		2263637500000000	1836290000000000	4099927500000000
2008	418200	326100		1965540000000000	1532670000000000	3498210000000000
2009	423600	340600		1990920000000000	1600820000000000	3591740000000000
2010	453100	362900		2129570000000000	1705630000000000	3835200000000000
2011	481600	391700		2263520000000000	1840990000000000	4104510000000000
2012	500000	411700		2350000000000000	1934990000000000	4284990000000000
2013	520900	430000		2448230000000000	2021000000000000	4469230000000000
2014	551800	451500		2593460000000000	2122050000000000	4715510000000000
2015	570000	460900		2679000000000000	2166230000000000	4845230000000000
2016	587100	476800		2759370000000000	2240960000000000	5000330000000000

## Sheet: Sheet7
Dongying NPP	Dongying NPP			Binzhou NPP	energy
energy= (NPP)*(8 KCal/g)*(4186 J/KCal)
2000	17354	3.61288e+17	2000	8346	2.38512e+17
2001	17316	3.60497e+17	2001	7951	2.27224e+17
2002	17279	3.59726e+17	2002	7936	2.26795e+17
2003	17766	3.69865e+17	2003	8559	2.44599e+17
2004	17886	3.72363e+17	2004	8960	2.56059e+17
2005	17492	3.64161e+17	2005	8163	2.33282e+17
2006	17832	3.71239e+17	2006	8609	2.46028e+17
2007	17580	3.65993e+17	2007	8285	2.36769e+17
2008	19850	4.13251e+17	2008	8845	2.52772e+17
2009	17532	3.64994e+17	2009	8828	2.52286e+17
2010	17560	3.65577e+17	2010	8240	2.35483e+17
2011	17743	3.69386e+17	2011	8541	2.44085e+17
2012	17918	3.7303e+17	2012	8708	2.48857e+17
2013	17739	3.69303e+17	2013	8631	2.46657e+17
2014	17780	3.70157e+17	2014	8533	2.43856e+17
2015	17639	3.67221e+17	2015	8467	2.4197e+17
2016	17876	3.72155e+17	2016	8735	2.49629e+17

## Sheet: Sheet8
				Topsoil losses:	Binzhou	Dongying	Donying-Binzhou	Soil loss	Binzhou	Dongying	Donying-Binzhou
	Binzhou Harvest cropland		Dongying Harvest cropland	energy=(Soil loss)*(Harvested cropland)*(organic content)*(5.4 Kcal/g)*(4186 J/Kcal)				energy=(Harvested cropland)*(Average elevation)
2000	4466	356.85	2379		1938264007680000	813091118112000	2751355125792000		4466000000000	1998360000000	6464360000000
2001	4503	335.4	2236		1.95432e+15	764216788608000	2718538962048000		4503000000000	1878240000000	6381240000000
2002	4500	365.7	2438		1.95302e+15	8.33256e+14	2786276211264000		4500000000000	2047920000000	6547920000000
2003	4493	290.7	1938		1.94998e+15	6.62367e+14	2612348915904000		4493000000000	1.62792e+12	6120920000000
2004	4360	277.35	1849		1892259532800000	6.31948e+14	2524208031072000		4360000000000	1.55316e+12	5913160000000
2005	4378	289.5	1930		1900071613440000	6.59633e+14	2559704172480000		4378000000000	1621200000000	5999200000000
2006	4380	338.4	2256		1900939622400000	771052359168000	2671991981568000		4380000000000	1895040000000	6275040000000
2007	4441	334.8	2232		1927413895680000	762849674496000	2690263570176000		4441000000000	1874880000000	6315880000000
2008	4266	390.83	2605.53		1851463111680000	8.90514e+14	2.74198e+15		4266000000000	2.18865e+12	6454645811352
2009	4440	398.55	2657		1926979891200000	908104640790451	2835084531990451		4440000000000	2231877768120	6671877768120
2010	4364	414.77	2765.13		1893995550720000	9.45062e+14	2.83906e+15		4364000000000	2322709677288	6686709677288
2011	4379	410.61	2737.4		1900505617920000	9.35584e+14	2.83609e+15		4379000000000	2299413700584	6678413700584
2012	4359	432.69	2884.6		1891825528320000	9.85893e+14	2877718884294458		4359000000000	2423061576936	6782061576936
2013	4313	438.47	2923.13		1871861322240000	9.99063e+14	2870924530990192		4313000000000	2.45543e+12	6768429544568
2014	4433	412.51	2750.06		1923941859840000	9.39913e+14	2.86385e+15		4433000000000	2.31005e+12	6743053689944
2015	4533	409	2726.66		1.96734e+15	9.31915e+14	2.89926e+15		4533000000000	2.2904e+12	6823397709600
2016	4553	430	2866.66		1.97602e+15	9.79764e+14	2955786531274886		4553000000000	2.408e+12	6960997592000

## Sheet: Sheet10
Dongying import energy	Raw coal(10kt)	Nature gas（10e+05m³）	Crude oill（10kt）	Gasoline	Diesel	Fuel oil	Raw coal(J)	Nature gas（J）	Crude oill（J）	Gasoline(J)	Diesel(J)	Fuel oil(J)
2015	441.7	34150	1335	5.5	71.1	2305	1.40461e+17	1.28171e+16	5.5803e+17	2535500000000000	2.97198e+16	1.10179e+18	1.40461e+17
2014	399.2	11140	1509.2	5.35	30.9	1910	1.26946e+17	4181028706400000	6.30846e+17	2466350000000000	1.29162e+16	9.1298e+17	1.26946e+17
2013	398.6	6289	1298.1	4.1	9.1	1243	1.26755e+17	2360367103640000	5.42606e+17	1890100000000000	3803800000000000	5.94154e+17	1.26755e+17
2012	691.1	4827	1181.5	4.4	31.1	836	2.1977e+17	1811654000520000	4.93867e+17	2028400000000000	1.29998e+16	3.99608e+17	2.1977e+17
2011	688.4	3647	969.2	3.6	2.4	663.8	2.18911e+17	1368780223720000	4.05126e+17	1659600000000000	1003200000000000	3.17296e+17	2.18911e+17
2010	608.9	4283	821.7	2.7	2.5	656.1	1.9363e+17	1607481683080000	3.43471e+17	1244700000000000	1045000000000000	3.13616e+17	1.9363e+17
2009	644.5	8149	948.6	2.1	1.9	252.6	2.04951e+17	3058456277240000	3.96515e+17	968100000000000	794200000000000	1.20743e+17	2.04951e+17
2008	426.3	7610	907.4	2.4	2.9	197.6	1.35563e+17	2856160543600000	3.79293e+17	1106400000000000	1212200000000000	9.44528e+16	1.35563e+17
2007	373.8	7441	892.8	2.3	5.4	146.1	1.18868e+17	2792732011160000	3.7319e+17	1060300000000000	2257200000000000	6.98358e+16	1.18868e+17
2006	600.8	5139	733.2	2.1	6.9	67.7	1.91054e+17	1928752829640000	3.06478e+17	968100000000000	2884200000000000	3.23606e+16	1.91054e+17
2005	526.6	4953	792	6.5	20.1	47.9	1.67459e+17	1858943912280000	3.31056e+17	2996500000000000	8401800000000000	2.28962e+16	1.67459e+17
2004	368.2	4736	511.3	1.3	22.4	31	1.17088e+17	1777500175360000	2.13723e+17	599300000000000	9363200000000000	1.4818e+16	1.17088e+17
2003	244.4	4110	363.9	0.9	18.6	11	7.77192e+16	1542551883600000	1.5211e+17	414900000000000	7774800000000000	5258000000000000	7.77192e+16
2002	222.5	3539	266.9	4.5	24.7	13.1	7.0755e+16	1328246013640000	1.11564e+17	2074500000000000	1.03246e+16	6261800000000000	7.0755e+16
2001	196.9	2785	236	3.8	22.2	0.9	6.26142e+16	1045257176600000	9.8648e+16	1751800000000000	9279600000000000	430200000000000	6.26142e+16
2000	155.5	2636	193.5	5.9	19.8	1.8	4.9449e+16	989334979360000	8.0883e+16	2719900000000000	8276400000000000	860400000000000	4.9449e+16
Binzhou import energy	Raw coal(10E+05t)	Nature gas（10e+05m³）	Crude oill（10E+05t）	Gasoline（10kt）	Diesel(10E+05t)	Fuel oil(10E+05t)	Raw coal(J)	Nature gas（J）	Crude oill（J）	Gasoline(J)	Diesel(J)	Fuel oil(J)
2016	5907.4	67537	544	0.6	1.2	685	1.87855e+18	2.53478e+16	2.27392e+17	276600000000000	501600000000000	3.2743e+17
2015	3841	44606	349	0.7	1.2	510	1.22144e+18	1.67414e+16	1.45882e+17	322700000000000	501600000000000	2.4378e+17
2014	1312	33678	345	0.9	1.1	262	4.17216e+17	1.26399e+16	1.4421e+17	414900000000000	459800000000000	1.25236e+17
2013	1296	30676	324	0.7	1.3	227	4.12128e+17	1.15132e+16	1.35432e+17	322700000000000	543400000000000	1.08506e+17
2012	1327	18270	265	0.8	1.3	250	4.21986e+17	6857037205200000	1.1077e+17	368800000000000	543400000000000	1.195e+17
2011	1343	15672	242	0.6	1.3	214	4.27074e+17	5881964262720000	1.01156e+17	276600000000000	543400000000000	1.02292e+17
2010	1244	11609	295	0.7	1.4	155	3.95592e+17	4357052266840000	1.2331e+17	322700000000000	585200000000000	7.409e+16
2009	1151	10521	291	0.9	1.2	103	3.66018e+17	3948707631960000	1.21638e+17	414900000000000	501600000000000	4.9234e+16
2008	1103	9454	286	1	1.7	69	3.50754e+17	3548244649040000	1.19548e+17	461000000000000	710600000000000	3.2982e+16
2007	1057	8876	290	1.1	1.9	57	3.36126e+17	3331311561760000	1.2122e+17	507100000000000	794200000000000	2.7246e+16
2006	1019	9275	285	1.1	1.8	43	3.24042e+17	3481062949000000	1.1913e+17	507100000000000	752400000000000	2.0554e+16
2005	988	8543	279	1.3	2.4	32	3.14184e+17	3206331080680000	1.16622e+17	599300000000000	1003200000000000	1.5296e+16
2004	864	8039	247	1.5	3.7	27	2.74752e+17	3017171433640000	1.03246e+17	691500000000000	1546600000000000	1.2906e+16
2003	698	7218	169	1.2	1.2	9.7	2.21964e+17	2709036373680000	7.0642e+16	553200000000000	501600000000000	4636600000000000
2002	524	6435	134	0.9	5.9	6.4	1.66632e+17	2415163350600000	5.6012e+16	414900000000000	2466200000000000	3059200000000000
2001	461	5879	92	2.3	6.3	2.1	1.46598e+17	2206487232040000	3.8456e+16	1060300000000000	2633400000000000	1003800000000000
2000	357	5217	77	2.5	9.7	0.8	1.13526e+17	1958027536920000	3.2186e+16	1152500000000000	4054600000000000	382400000000000

## Sheet: Sheet11
Dongying Consumption	Raw coal(10E+05t)	Nature gas（10e+05m³）	Crude oill（10E+05t）	Gasoline（10kt）	Diesel(10E+05t)	Fuel oil(10E+05t)	electricity（10e+04kw/h）	Energy=(Consumption)*(energy content)	Raw coal(J)	Nature gas（10e+05m³）	Crude oill（10E+05t）	Gasoline（10kt）	Diesel(10E+05t)	Fuel oil(10E+05t)	electricity（10e+04kw/h）
2016	1512	34092	2222	5.5	71.2	2311	2453497	2016	4.80816e+17	1.27953e+16	9.28796e+17	2535500000000000	2.97616e+16	1.10466e+18	8.80805e+16
2015	1421	27711	1791	6.8	35.3	1924	2310000	2015	4.51878e+17	1.04004e+16	7.48638e+17	3134800000000000	1.47554e+16	9.19672e+17	8.2929e+16
2014	2318	26907	1534	5.6	14.2	1235.8	2187532	2014	7.37124e+17	1.00986e+16	6.41212e+17	2581600000000000	5935600000000000	5.90712e+17	7.85324e+16
2013	2169	25762	1464	6	36.3	833.8	1948601	2013	6.89742e+17	9668910371120000	6.11952e+17	2766000000000000	1.51734e+16	3.98556e+17	6.99548e+16
2012	2033	25591	1244	5.6	4.8	677	1850929	2012	6.46494e+17	9604731205160000	5.19992e+17	2581600000000000	2006400000000000	3.23606e+17	6.64484e+16
2011	1735	25240	1079	4.6	5.4	645	1625644	2011	5.5173e+17	9472995022400000	4.51022e+17	2120600000000000	2257200000000000	3.0831e+17	5.83606e+16
2010	1388	24039	1137	3.7	5.5	251	1497658	2010	4.41384e+17	9022239593640000	4.75266e+17	1705700000000000	2299000000000000	1.19978e+17	5.37659e+16
2009	1312	22718	1176	3.9	5.7	187	1408762	2009	4.17216e+17	8526446153680000	4.91568e+17	1797900000000000	2382600000000000	8.9386e+16	5.05746e+16
2008	1223	21625	1126.4	4.2	6.5	154	1307196	2008	3.88914e+17	8116224935000000	4.70835e+17	1936200000000000	2717000000000000	7.3612e+16	4.69283e+16
2007	1104	20332	984.6	6.3	22.7	75.8	1160359	2007	3.51072e+17	7630940364320000	4.11563e+17	2904300000000000	9488600000000000	3.62324e+16	4.16569e+16
2006	734	51780	792.1	6.6	21.5	49	900946	2006	2.33412e+17	1.94339e+16	3.31098e+17	3042600000000000	8987000000000000	2.3422e+16	3.2344e+16
2005	771	51220	671.2	6.1	20.9	28.1	790378	2005	2.45178e+17	1.92237e+16	2.80562e+17	2812100000000000	8736200000000000	1.34318e+16	2.83746e+16
2004	735	51210	541.2	5.7	20.3	18.2	706199	2004	2.3373e+17	1.922e+16	2.26222e+17	2627700000000000	8485400000000000	8699600000000000	2.53525e+16
2003	1272	51106	462.7	6.6	35.6	19.9	686993	2003	4.04496e+17	1.91809e+16	1.93409e+17	3042600000000000	1.48808e+16	9512200000000000	2.4663e+16
2002	1169	52201	436.2	4.8	21.7	23.9	632573	2002	3.71742e+17	1.95919e+16	1.82332e+17	2212800000000000	9070600000000000	1.14242e+16	2.27094e+16
2001	1012	81649	380.3	5.1	19.3	20.5	639936	2001	3.21816e+17	3.06442e+16	1.58965e+17	2351100000000000	8067400000000000	9799000000000000	2.29737e+16
2000	977	78262	368.5	4.4	17.9	22.2	669395	2000	3.10686e+17	2.9373e+16	1.54033e+17	2028400000000000	7482200000000000	1.06116e+16	2.40313e+16
Binzhou Consumption	Raw coal(10E+05t)	Nature gas（10e+05m³）	Crude oill（10E+05t）	Gasoline（10kt）	Diesel(10E+05t)	Fuel oil(10E+05t)	electricity（10e+04kw/h）	Energy=(Consumption)*(energy content)	Raw coal(J)	Nature gas（10e+05m³）	Crude oill（10E+05t）	Gasoline（10kt）	Diesel(10E+05t)	Fuel oil(10E+05t)	electricity（10e+04kw/h）
2016	5692	67542	551	0.6	1.2	680	1550000	2016	1.81006e+18	2.53496e+16	2.30318e+17	276600000000000	501600000000000	3.2504e+17	5.5645e+16
2015	3654	44748	344	0.7	1.3	495	1540000	2015	1.16197e+18	1.67947e+16	1.43792e+17	322700000000000	543400000000000	2.3661e+17	5.5286e+16
2014	1334	33623	337	0.9	1.1	263	1510000	2014	4.24212e+17	1.26193e+16	1.40866e+17	414900000000000	459800000000000	1.25714e+17	5.4209e+16
2013	1287	30700	324	0.7	1.3	225	1480000	2013	4.09266e+17	1.15222e+16	1.35432e+17	322700000000000	543400000000000	1.0755e+17	5.3132e+16
2012	1281	18318	263	0.8	1.2	246	1460000	2012	4.07358e+17	6875052409680000	1.09934e+17	368800000000000	501600000000000	1.17588e+17	5.2414e+16
2011	1307	15662	246	0.6	1.3	214	1430000	2011	4.15626e+17	5878211095120000	1.02828e+17	276600000000000	543400000000000	1.02292e+17	5.1337e+16
2010	1232	11609	290	0.7	1.5	154	1450000	2010	3.91776e+17	4357052266840000	1.2122e+17	322700000000000	627000000000000	7.3612e+16	5.2055e+16
2009	1187	10253	286	0.8	1.6	109	1450000	2009	3.77466e+17	3848122740280000	1.19548e+17	368800000000000	668800000000000	5.2102e+16	5.2055e+16
2008	1152	9453	310	1	1.7	62	1420000	2008	3.66336e+17	3547869332280000	1.2958e+17	461000000000000	710600000000000	2.9636e+16	5.0978e+16
2007	1095	8764	304	1.1	1.8	54	1590000	2007	3.4821e+17	3289276084640000	1.27072e+17	507100000000000	752400000000000	2.5812e+16	5.7081e+16
2006	1034	8652	297	1.3	2.1	40	1360000	2006	3.28812e+17	3247240607520000	1.24146e+17	599300000000000	877800000000000	1.912e+16	4.8824e+16
2005	963	8211	288	1.1	3.4	28	999000	2005	3.06234e+17	3081725916360000	1.20384e+17	507100000000000	1421200000000000	1.3384e+16	3.58641e+16
2004	822	7834	259	1	4.1	24	663000	2004	2.61396e+17	2940231497840000	1.08262e+17	461000000000000	1713800000000000	1.1472e+16	2.38017e+16
2003	671	6987	206	1.4	1.8	8.2	394000	2003	2.13378e+17	2622338202120000	8.6108e+16	645400000000000	752400000000000	3919600000000000	1.41446e+16
2002	492	6319	197	1.2	2.1	4.9	369000	2002	1.56456e+17	2371626606440000	8.2346e+16	553200000000000	877800000000000	2342200000000000	1.32471e+16
2001	407	5572	154	1.2	1.4	1.7	286000	2001	1.29426e+17	2091264986720000	6.4372e+16	553200000000000	585200000000000	812600000000000	1.02674e+16
2000	335	5493	112	1.1	1.8	0.3	139900	2000	1.0653e+17	2061614962680000	4.6816e+16	507100000000000	752400000000000	143400000000000	5022410000000000

[truncated: 3 more sheets: Sheet9, Sheet13, Sheet14]
